# Supplementary material
Source: HighWire-hosted journal article supplement (https://erj.ersjournals.com/content/58/5/2004240)

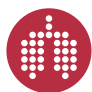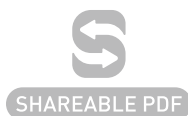

# Eliapixant (BAY 1817080), a P2X3 receptor antagonist, in refractory chronic cough: a randomised, placebo-controlled, crossover phase 2a study

Alyn Morice <sup>1</sup>, Jaclyn A. Smith <sup>2</sup>, Lorcan McGarvey <sup>3</sup>, Surinder S. Birring <sup>4</sup>, Sean M. Parker <sup>5</sup>, Alice Turner <sup>6</sup>, Thomas Hummel <sup>7</sup>, Isabella Gashaw <sup>8</sup>, Lueder Fels <sup>8</sup>, Stefan Klein <sup>8</sup>, Klaus Francke <sup>8</sup> and Christian Friedrich <sup>8</sup>

<sup>1</sup>Respiratory Research Group, Hull York Medical School, University of Hull, Hull, UK. <sup>2</sup>Manchester University NHS Foundation Trust and Manchester Academic Health Science Centre, Manchester, UK. <sup>3</sup>Wellcome Wolfson Institute of Experimental Medicine, School of Medicine, Dentistry and Biomedical Sciences, Queen's University Belfast, Belfast, UK. <sup>4</sup>Centre for Human and Applied Physiological Sciences, School of Basic and Medical Biosciences, Faculty of Life Sciences and Medicine, King's College Hospital, London, UK. <sup>5</sup>North Tyneside Hospital, Northumbria Healthcare NHS Foundation Trust, North Shields, UK. <sup>6</sup>Institute of Applied Health Research and Population Sciences, University of Birmingham, Birmingham, UK. <sup>7</sup>Smell and Taste Clinic, Dept of Otorhinolaryngology, TU Dresden, Dresden, Germany. <sup>8</sup>Bayer AG, Berlin, Germany.

Corresponding author: Alyn Morice ([a.h.morice@hull.ac.uk](mailto:a.h.morice@hull.ac.uk))

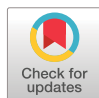

Shareable abstract (@ERSpublications)

**The highly selective P2X3 antagonist eliapixant (BAY 1817080) significantly reduced cough frequency and severity in patients with refractory chronic cough. Mild taste-related adverse events were reported in 5–21% of patients, depending on the dose.** <https://bit.ly/3afVIVM>

**Cite this article as:** Morice A, Smith JA, McGarvey L, *et al.* Eliapixant (BAY 1817080), a P2X3 receptor antagonist, in refractory chronic cough: a randomised, placebo-controlled, crossover phase 2a study. *Eur Respir J* 2021; 58: 2004240 [DOI: 10.1183/13993003.04240-2020].

This single-page version can be shared freely online.

Copyright ©The authors 2021.

This version is distributed under the terms of the Creative Commons Attribution Non-Commercial Licence 4.0. For commercial reproduction rights and permissions contact [permissions@ersnet.org](mailto:permissions@ersnet.org)

This article has supplementary material available from [erj.ersjournals.com](http://erj.ersjournals.com)

Received: 17 Nov 2020  
Accepted: 5 April 2021

## Abstract

**Background** ATP acting via P2X3 receptors is an important mediator of refractory chronic cough (RCC). This phase 2a double-blinded crossover study assessed the safety, tolerability and efficacy of eliapixant (BAY 1817080), a selective P2X3 receptor antagonist, in adults with RCC attending specialist centres.

**Methods** In period A, patients received placebo for 2 weeks then eliapixant 10 mg for 1 week. In period B, patients received eliapixant 50, 200 and 750 mg twice daily for 1 week per dose level. Patients were randomised 1:1 to period A–B (n=20) or B–A (n=20). The primary efficacy end-point was change in cough frequency assessed over 24 h. The primary safety end-point was frequency and severity of adverse events (AEs).

**Results** 37 patients completed randomised therapy. Mean cough frequency fell by 17.4% versus baseline with placebo. Eliapixant reduced cough frequency at doses ≥50 mg (reduction versus placebo at 750 mg: 25% (90% CI 11.5–36.5%); p=0.002). Doses ≥50 mg also significantly reduced cough severity. AEs, mostly mild or moderate, were reported in 65% of patients with placebo and 41–49% receiving eliapixant. Cumulative rates of taste-related AEs were 3% with placebo and 5–21% with eliapixant; all were mild.

**Conclusions** Selective P2X3 antagonism with eliapixant significantly reduced cough frequency and severity, confirming this as a viable therapeutic pathway for RCC. Taste-related side-effects were lower at therapeutic doses than with the less selective P2X3 antagonist gefapixant. Selective P2X3 antagonism appears to be a novel therapeutic approach for RCC.

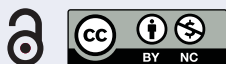

Supplement: inline-supplementary-material-2 [file inline-supplementary-material-2.pdf]
